# Supplementary material for: Сравнительный анализ динамики уровня насильственной смертности в России и Беларуси
Source: Frontiers journal article supplement (doi:10.3389/fpsyg.2021.711652), 2003-01-01
Supplement: Data_Sheet_1.xlsx [file Data_Sheet_1.xlsx]

## Sheet: Sheet1
Quality Evaluation and Information Extraction Form
Basic information	Tital		Delivery of self training and education for stressful situations(DESTRESS-PC):a randomized trial of nurse assisted online self-management for PTSD in primary care	Telemedicine versus in-person delivery of cognitive processing therapy for women with posttraumatic stress disorder:a randomized noninferiority trial	An Internet-Based Writing Intervention for PTSD in Veterans: A Feasibility and Pilot Effectiveness Trial	A brief self-guided telehealth intervention for post-traumatic stress disorder in combat veterans	Evaluation of an internet-based intervention for service members of the German armed forces with deploymentrelated posttraumatic stress symptoms	Web Intervention for OEF/OIF Veterans with Problem Drinking and PTSD Symptoms	Exposure Therapy for PTSD Delivered to Veterans via Telehealth: Predictors of Treatment Completion and Outcome and Comparison to Treatment Delivered in Person	Web-Based Trauma Intervention for Veterans Has Physical Health Payoff in Randomized Trial	A Randomized, Controlled Proof-of-Concept Trial of an Internet-Based,Therapist-Assisted Self-Management Treatment for Posttraumatic Stress Disorder	A Pilot Study Comparing Peer Supported Web-based CBT to Self-Managed Web CBT for Primary Care Veterans with PTSD and Hazardous Alcohol Use
	ID		10.1016/j.genhosppsych.2015.04.007	10.1002/da.22397	10.1037/tra0000176	10.1258/jtt.2011.100909	10.1186/s12888-020-02595-z	: 10.1037/a0033697 · Source: PubMed	10.1016/j.beth.2010.07.005	10.1037/tra0000184	10.1176/appi.ajp.2007.06122057	10.1037/prj0000334
	Abstract		Objective—This randomized controlled trial examined the effectiveness of a nurse assistedResults—DESTRESS-PC was associated with a significantly greater decrease in PTSD symptoms compared to OUC (F(3, 186)=3.72, p=.012). The effect was largest at the 12-week assessment (ΔPCL=12.6±16.6 versus 5.7±12.5, p<0.05) with the treatment effect disappearing by the 18-week follow-up. Notably, there was a do…	This study examined the effectiveness of telemedicine to provide specialty mental health care for women in rural or remote areas. psychotherapy to women with posttraumatic stress disorder (PTSD) who might be unable to access treatment. Objectives were to compare clinical and process outcomes of PTSD treatment delivered via videoteleconferencing (VTC) and inperson (NP) in an ethnically diverse sam…	Veterans suffering from posttraumatic stress disorder (PTSD) may avoid or fail to follow through with a full course of face-to-face mental health treatment for a variety of reasons. We conducted a pilot effectiveness trial of an online intervention for veterans with current PTSD to determine the feasibility, safety, and preliminary effectiveness of an online writing intervention (i.e., Warriors I…	To engage more US combat veterans in PTSD treatment, we offered a psychological intervention that could be initiated in primary care and completed using the Internet. Participants (n ¼ 31) were randomized to complete either Written Emotional Disclosure (WED) or time management narratives on a secure Internet website. In the WED group, participants wrote about their thoughts and emotions regarding…	Background: The present study was designed to evaluate the efficacy of a therapist-guided internet-based cognitive-behavioral therapy (iCBT) intervention for service members of the German Armed Forces with posttraumatic stress disorder (PTSD). The iCBT was adapted from Interapy, a trauma-focused evidence-based treatment based on prolonged exposure and cognitive restructuring. It lasted for 5 week…	Veterans who served in Operation Enduring Freedom (OEF) and Operation Iraqi Freedom (OIF) commonly experience alcohol misuse and symptoms of posttraumatic stress disorder (PTSD) following their return from deployment to a war zone. We conducted a randomized clinical trial to evaluate the efficacy of a newly developed, 8-module, self-management web intervention (VetChange) based on motivational an…	Recent research has focused on the effectiveness of evidence-based psychotherapy delivered via telehealth services. Unfortunately to date, the majority of studies employ very small samples and limited predictor and moderator variables. To address these concerns and further replicate and extend the literature on telehealth, the present study investigated the effectiveness of 12-session exposure th…	Objective: PTSD and depression are related to perceived physical health impairment in veterans, but little is known about the effects of psychological treatment on impairment. We examined the impact of an interactive online treatment for veterans with trauma-related distress, including (a) whether treatment effects include reduced perceived physical impairment, and (b) how these treatment effects…	Objective: The authors report an 8-week randomized, controlled proof-of-concept trial of a new therapist-assisted, Internet- based, self-management cognitive behav- ior therapy versus Internet-based sup- portive counseling for posttraumatic stress disorder (PTSD). Method: Service members with PTSD from the attack on the Pentagon on Sep- tember 11th or the Iraq War were ran- domly assigned to self…	Objective: Many combat veterans struggle with Posttraumatic Stress Disorder (PTSD) and hazardous alcohol use and are hesitant to engage in behavioral health services. Combining peer support with an eHealth intervention may overcome many barriers to care. This pilot study investigated the feasibility of adding peer support to a web-based cognitive behavior therapy (CBT) targeting PTSD symptoms and…
	Year		2015	2015	2016	2011	2020	2013	2011	2016	2007	2019
	Author(s)		Charles C.Engel, Brett Litz, Kathryn M.Magruder, Elizabeth Harper, Kristie Gore, Nathan Stein, Derik Yeager, Xian Liu, T.Ray Coe	Leslie A. Morland, Margaret-Anne Mackintosh, Craig S. Rosen, Emy Willis, Patricia Resick, Kathleen Chard, B. Christopher Frueh	Janice L. Krupnick and Bonnie L. Green; Richard Amdur; Adil Alaoui and Anas Belouali;Erika Roberge, David Cueva, Miguel Roberts, and Elizabeth Melnikoff;Mary Ann Dutton	Kyle Possemato*†, Paige Ouimette*† and Paul Knowlton	Helen Niemeyer, Christine Knaevelsrud, Sarah Schumacher, Sinha Engel, Annika Kuester, Sebastian Burchert, Beate Muschalla, Deborah Weiss, Jan Spies, Heinrich Rau, Gerd-Dieter Willmund	Deborah J. Brief, Amy Rubin, and Terence M. Keane；Justin L. Enggasser and Monica Roy；Eric Helmuth； John Hermos；Mark Lachowicz； Denis Rybin；David Rosenbloom	Daniel F. Gros，Matthew Yoder，Peter W. Tuerk，Brian E. Lozano，Ron Acierno	Natalie R Stevens, Lucie Holmgreen, Lisa Walt, Richard Gengler, Stevan E Hobfoll	Brett T. Litz, Charles C. Engel, Richard A. Bryant, Anthony Papa	Kyle Possemato, Emily M. Johnson, J. Bronte Emery, Michael Wade, Michelle C. Acosta, Lisa A. Marsch, Andrew Rosenblum, Stephen A. Maisto
	Journal,issue,page		Gen Hosp Psychiatry.Jul-Aug 2015;37(4):323–328.	Depression Anxiety.2015 Nov;32(11):811-20.	Psychological Trauma Theory Research Practice and Policy, 2017, 9(4):461-470.	Journal of Telemedicine and Telecare 2011; 17: 245–250	BMC Psychiatry.2020 May 6;20(1):205.		Behavior Therapy 42 (2011) 276–283	Psychol Trauma.2017 Aug;9(Suppl 1):42-50.	American Journal of Psychiatry.2007 Nov;164(11):1676–1683.	Psychiatr Rehabil J .2019 September;42(3):305–313.
	Country		USA	USA	USA	USA	Germany	USA	USA	USA	USA	USA
	Article Types(full-text/abstract/unpublished)		full text	full text	全文	全文	full text	全文	全文	full text	full text	full text
information about evaluator	Evaluator's name		Yang Zhou	Yang Zhou	周杨	周杨	Yang Zhou	周杨	范子嘉	Zijia Fan	Zijia Fan	Zijia Fan
	Evaluation date		2020.11.19	2020.11.19	2020.11.20	2020.11.20	2020.11.21	2020.11.21	2020.11.28	2020.12.19	2020.12.19	2020.12.19
Validation of document eligibility data
Article Types	Is the study a randomized controlled experiment or a quasi-randomized controlled experiment?（Yes/Unclear/No）		Yes	Yes	是	是	Yes	是	不是	Yes	Yes	Yes
	Types of study design		rct	rct	rct	rct	rct	rct	rct	rct	rct	rct
Participants	Is it clear what group the research object is?（Yes/Unclear/No）		Yes	Yes	是	是	Yes	是	是	Yes	Yes	Yes
	reseaarch site		healthcare site& website	National Center for PTSD in the Department of Veterans Affairs (VA) in Honolulu, Hawaii.	A multifaceted WIRED website	web of science	web of science	web	web	web	web	web
	the number of the participants accessed for eligibility		119	149	34	48	41	1340		475	100	40
	the number of participants included in analysis		80	126	34	31	37	600	64	303	45	30
	Recruitment source		VA or DoD primary care clinic	were recruited through VA clinical sites, Vet Centers, community providers, community outreach events, and radio, newspaper, and internet advertisements.	All research participants were recruited from the Trauma Services Program, VA Medical Center, Washington, DC.	Primary care patients at two VA facilities were recruited	The sample was recruited via advertisements in military journals, on websites and in online chat rooms for service members.	We recruited participants through targeted Facebook advertising	Patients were selected from a large southeastern Veterans Administration Medical Center (VAMC; direct service population estimated at 550,000 at 2000 U.S. Census) and its associated community-based outpatient clinics (CBOCs; service populations ranged from 140,000 to 290,000 at 2000 U.S. Census) as part of standard clinic practice.	Veterans were recruited via e-mail through the Iraq and Afghanistan Veterans of America	The participants were recruited through advertisements and presentations at Department of Defense sites	Iraq/ Afghanistan War Veterans with PTSD and hazardous substance use enrolled in VHA primary care
	The researcher's definition of the problem and the means of intervention		The design was a two parallel arm randomized controlled trial comparing DESTRESS-PC (Delivery of Self Training and Education for Stressful Situations-Primary Care version) to OUC in primary care. Participants were assessed at baseline and at 6, 12 and 18 weeks post-randomization for PTSD as well as depression, anxiety, somatic symptoms, and functional status	Individual CPT was delivered via VTC or NP to participants once or twice a week for a total of 12, 90-minute sessions. Therapist adherence to the treatment protocol and competence of CPT administration, rated using a standardized rating system specific to the CPT individual protocol, were found to be very high. Participants were assessed at baseline, midtreatment, approximately 2 weeks posttreatm…	Veterans (N=34) who had served in Iraq or Afghanistan with current PTSD subsequent to deployment-related trauma were randomized to Veterans Affairs (VA) mental health treatment as usual (TAU) or to treatment as usual plus the online intervention (TAU ? WIRED). All research participants were recruited from the Trauma Services Program, VA Medical Center, Washington, DC. They completed baseline asse…	To engage more US combat veterans in PTSD treatment, we offered a psychological intervention that could be initiated in primary care and completed using the Internet. Participants (n ¼ 31) were randomized to complete either Written Emotional Disclosure (WED) or time management narratives on a secure Internet website.	Psychopathology was assessed at pre-treatment, post-treatment, and 3-month follow- up. Severity of PTSD was the primary outcome and anxiety was the secondary outcome. Participants were randomly allocated to a treatment group that received iCBT immediately or to a waitlist group that received iCBT after 6 weeks.			A randomized controlled trial assessed the impact on perceived physical health impairment of interactive online treatment for veterans with symptoms of PTSD and depression. Veterans were randomized to either the Vets Prevail program (n ? 209), or a no-treatment control (n ? 94) completing measures of depression and PTSD symptomology as well as perceived physical health impairment at 6 and 12 week…	Service members with PTSD from the attack on the Pentagon on Sep- tember 11th or the Iraq War were ran- domly assigned to self-management cog- nitive behavior therapy (N=24) or supportive counseling (N=21).The participants provided written informed consent. They were evaluated at baseline, after treatment, and at 3 and 6 months after baseline.	The parent trial for the current project was a test of a 12-week self-guided, structured web- based intervention, Thinking Forward, for Iraq/ Afghanistan War Veterans with PTSD and hazardous substance use enrolled in VHA primary care (Acosta et al., 2017; Possemato et al., 2015). Veterans were randomized to either receive Thinking Forward or primary care treatment as usual (TAU).
	Inclusion Criteria		candidates had had to be war veterans seeking care at a participating VA or DoD primary care clinic, report war-related trauma during deployment (to include military sexual trauma), screen positive on a 4-item PTSD screener [18], and meet criteria for PTSD on the ClinicianAdministered PTSD Scale (CAPS) using the 1–2 scoring rule [19].	diagnosis of current PTSD established by the Clinician-Administered PTSD Scale (CAPS)[27] and a stable psychotropic medication regimen for a minimum of 45 days prior to study entry for those taking such medications.	(a) having served in OIF/OEF/OND; (b) age over 18 years; (c) score _x005f_x0004_50 on the PCL; and (d) having had an intake session through the Trauma Services Program.	The inclusion criteria included combat exposure in Iraq or Afghanistan that met the DSM-IV criteria for a traumatic stressor and symptoms consistent with combat-related diagnostic-level or subthreshold PTSD (i.e. functional impairment associated with one re-experiencing symptom, plus three avoidance or two arousal symptoms).	Participants were deemed eligible for the current study if they met all of the following criteria: 1) male members of the German Armed Forces with clinical PTSD accord- ing to Diagnostic and Statistical Manual of Mental Disorders-5 (DSM-5) [64], or with subclinical symptoms, that is symptoms on one or more subscales of the CAPS without the overall number of symptoms for the clinical diagnosis. In…			Participants were 303 American military veterans who served after September 11, 2001.Veterans were eligible if they were at least 18 years of age, were able to read and speak English, were able to use computers unaided, and had steady access to a mobile phone and high-speed Internet	The patients were Department of Defense service members in the Washington, D.C., area who had PTSD as a result of the Penta- gon attack on September 11th or combat in Iraq/Afghanistan.	To be included in the study, participants had to be VHA primary care patients and Iraq/ Afghanistan War Veterans. Participants also needed hazardous alcohol use and to have either diagnostic-level PTSD or subthreshold PTSD (criterion A traumatic stressor plus 1 re- experiencing B symptom plus 3 avoidance C symptoms OR 2 arousal D symptoms) from DSM-IV criteria (Schnurr, Lunney, Sengupta, & Spiro,…
	Exclusion Criteria		(1) active engagement in trauma-focused mental health treatment in the previous 2 months; (2) recent history of failed specialty mental health treatment for PTSD or an associated condition; (3) acute psychosis, psychotic episode, or psychotic disorder diagnosed within the past 2 years; (4) active substance dependence in the past year; (5) active suicidal or homicidal ideation within the past 2 mo…	significant cognitive impairment or history of organic mental disorder, active psychotic symptoms/disorder, active homicidal or suicidal ideation, current substance dependence, and unwillingness to refrain from substance abuse during treatment.	(a) current substance dependence, acute suicidality, psychosis, or gross cognitive impairment and (b) current participation in PE, CPT, or CBT treatment.	gross cognitive impairment, current psychosis or suicidality, or participation in psychological treatment in the previous two months.	Exclusion criteria were acute psychosis, acute manic episode, current substance abuse or dependence, current suicidal ideation, neurological disorder, acute somatic disease, concurrent psychotherapeutic treatment, or unstable psychotropic medication.			Potential participants were ex- cluded if they reported psychiatric hospitalization over the course of the past five years, reported a history of suicide attempt(s), and/or if they had started or had an alteration in dosage of a psychotropic medication within 10 days before completing the eligibility screening. Veterans were also excluded if they were experiencing higher-than-moderate distress on…	Ex- clusion criteria were 1) active substance dependence, 2) current suicidal ideation, 3) history of psychotic disorder, 4) <21 or >65 years of age, 5) PTSD or depression immediately before the trauma, 6) current psychiatric treatment, 7) marked ongoing stressors, and 8) inadequate social supports. Medications varied but were stable and maintained.	Patients were excluded if they were enrolled in psychotherapy in the previous two months; had a change in any psychiatric medications in the last two months; or had a current plan or intent to harm themselves.
	Sex		Yes	No	是	是	Yes		是	Yes	Yes	Yes
	Age	Max	N	N	64	无	70			63	N	N
		Min	N	N	27	无	19			20	N	N
		Mean	36.7	46.4±11.9	40	34 11	37.7±8.8	32	45.1±15	34.36±8.01	34.75	39
	Country of Citizenship		No	No	无	无	Afghanistan、Bosnia、Kosovo、Mali、Somalia	有阿富汗，还有	Caucasian,African,American	not Hispanic, 71.6%), Hispanic (15.5%), or African American (6.9%)	No	No
	Others		No	（人种）Asian CaucasianPacific IslanderOther	ethnic group	Five participants (16%) served in Afghanistan, 22 (71%) in Iraq and four (13%) in both operations.	Employment status Work status Military unit Military ranks Country		served in Operational Iraqi/Enduring Freedom (OIF/OEF）	identified as primarily White	No	pramarily White
	Comorbidity		depression and anxiety	anxiety	无	无	The mean CAPS-5 score was 33.5 (SD= 14.9).Twenty-two participants (59.5%) had a PTSD diagnosis.Comorbid mood and anxiety disorders were common:13 patients (31.5%) suffered from comorbid major de- pression and n=7 (18.9%) reported dysthymia. Two pa- tients (5.41%) had experienced a lifetime manic episode and n=1 (2.7%) a lifetime hypomanic episode, but re- ported no current symptoms 13 patients (3…	alcohol misuse		depression	depression and anxiety	hazardous alcohol use
Intervention Measures	Are the interventions of the study clear?（Yes/Unclear/No）		Yes	Yes	是	是	Yes	是	是	Yes	Yes	Yes
	control group	Number	37	63	16	16	17	404	27	94	20	15
		Intervention Measures	OUC	NP	TAU	/	/	IIG	in-person	AAU	Internet-based supportive counseling	self-management thinking forward
	Experimental group	Number	43	61	18	15	21	196	37	209	23	15
		Intervention Measures	DESTRESS-PC	VTC	TAU _x005f_x005f_x0003_ WIRED	WED	iCBT	Delayed Intervention Group (DIG)VetChange	telehealth	VP	Internet-based, self-management cognitive behavior therapy	peer-supported thinking forward
	Additional comments on interventions		No	No	无	无	No		无	No	No	No
Outcome 1	Whether it is the primary outcome indicator（Yes/Unclear/No）		Yes	Yes	是	是	Yes	是	是	Yes	Yes	Yes
	Indicator 1	Measurement methods	Questionnaire	Questionnaire	问卷	问卷	Questionnaire	问卷	问卷	Questionnaire	Questionnaire	Questionnaire
		Measuring tools	Questionnaire	Questionnaire	问卷	问卷	Questionnaire	问卷	问卷	Questionnaire	Questionnaire	Questionnaire
		Measurement scale	PCL	CAPS	totalPCL	PCLM	CAPS	PCL-5	PCLM	PCL-M	PCL	CAPS
		Evaluation time	6 weeks	Postteatment	12weeks			T2		12weeks	Postteatment	12weeks
	Indicator 2	Measurement methods			问卷
		Measuring tools			问卷
		Measurement scale			Intrusive
		Evaluation time			12weeks
	Indicator 3	Measurement methods			问卷
		Measuring tools			问卷
		Measurement scale			Avoidant
		Evaluation time			12weeks
	Indicator 4	Measurement methods			问卷
		Measuring tools			问卷
		Measurement scale			Numb
		Evaluation time			12weeks
	Indicator 5	Measurement methods			问卷
		Measuring tools			问卷
		Measurement scale			Hyperarousal
		Evaluation time			12weeks
	……
	Is there a subgroup analysis in this study		No	No	无	无	No	无	无	No	No	No
	Is there any withdrawal/drop to follow-up in this study?		Yes	Yes	无	有	Yes	有		Yes	Yes	Yes
	Experimental group	The number of dropout	12	20		5	11	76		43	9	6
		The reason of dropout	Unclear	Unclear		无	Reasons reported for dropout comprised difficulties with internet connection (n=1), lack of motivation for treatment (n=1), preferring face-to-face over online settings (n=4), feeling no improvement (n=2), and hospital admission (n=1). One participant did not report a reason for dropout			Unclear	Unclear	Unclear
	control group 1	The number of dropout	4	14		无	9	209		4	3	4
		The reason of dropout	Unclear	Unclear			Reasons reported for dropout comprised difficulties with internet connection (n=1), lack of motivation for treatment (n=1), preferring face-to-face over online settings (n=4), feeling no improvement (n=2), and hospital admission (n=1). One participant did not report a reason for dropout			Unclear	Unclear	Unclear
	control group 2	The number of dropout
		The reason of dropout
	Result description (binary variable)
	Experimental group	Number of incidents
		No incidents
		Total
	control group	Number of incidents
		No incidents
		Total
	Result description (continuous variable)		The correlation between the number of logins completed and the decrease in PCL scores was r=.36, p=.041.
	Experimental group
	Indicator 1	Before intervention（M±SD）	58.00±9.95	67.2	3.6 _x005f_x0008_ .3	46（14）		40	63.2±10.4	40.03 ±11.19	26.71±9.02	48.2±11.62
		After the intervention（M±SD）	50.72±18.76	44±29.11	3.58 0.3		32.71±9.24	37	47.8±15.0	34.06 ±11.05	14.86±13.35	41.78±14.90
	Indicator 2	Before intervention（M±SD）			3.4 _x005f_x0008_ .8
		After the intervention（M±SD）			3.08 0.9
	Indicator 3	Before intervention（M±SD）			3.7 _x005f_x0008_ .5
		After the intervention（M±SD）			自己算
	Indicator 4	Before intervention（M±SD）			3.9 _x005f_x0008_ .6
		After the intervention（M±SD）			自己算
	Indicator 5	Before intervention（M±SD）			3.9 _x005f_x0008_ .6
		After the intervention（M±SD）			自己算
	control group
	Indicator 1	Before intervention（M±SD）	54.48±11.23	66.7	3.9 _x005f_x0008_ .4			41	62.5±10.1	37.46 ±11.48	29.16±9.93	51.87±9.01
		After the intervention（M±SD）	48.52±13.97	48.6±26.79	3.91 0.4		33.6±15.3	33	31.6±10.5	38.54 ±12.80	20±11.5	43.16±13.42
	Indicator 2	Before intervention（M±SD）			4.1 _x005f_x0008_ .5
		After the intervention（M±SD）			3.95 0.7
	Indicator 3	Before intervention（M±SD）			3.9 _x005f_x0008_ .6
		After the intervention（M±SD）			自己算
	Indicator 4	Before intervention（M±SD）			4.0 _x005f_x0008_ .9
		After the intervention（M±SD）			自己算
	Indicator 5	Before intervention（M±SD）			4.3 _x005f_x0008_ .4
		After the intervention（M±SD）			自己算
	Other information or comments
	Comment 1
	Comment 2
	Points to be discussed or clarified
Outcome 2	Whether it is the primary outcome indicator（Yes/Unclear/No）		Yes	Yes	是			是			Yes	Yes
	Indicator 1	Measurement methods	Questionnaire	Questionnaire	问卷			问卷			Questionnaire	Questionnaire
		Measuring tools	Questionnaire	Questionnaire	问卷			问卷			Questionnaire	Questionnaire
		Measurement scale	PCL	CAPS	totalPCL			PCL-5			PCL	CAPS
		Evaluation time	12 weeks	3-month followup	24weeks			3-month			3-months	24weeks
	Indicator 2	Measurement methods			问卷
		Measuring tools			问卷
		Measurement scale			Intrusive
		Evaluation time			24weeks
	Indicator 3	Measurement methods			问卷
		Measuring tools			问卷
		Measurement scale			Avoidant
		Evaluation time			24weeks
	Indicator 4	Measurement methods			问卷
		Measuring tools			问卷
		Measurement scale			Numb
		Evaluation time			24weeks
	Indicator 5	Measurement methods			问卷
		Measuring tools			问卷
		Measurement scale			Hyperarousal
		Evaluation time			24weeks
	……
	Is there a subgroup analysis in this study		No	No	无			无			No	No
	Is there any withdrawal/drop to follow-up in this study?		Yes	Yes	无			有			Yes	No
	Experimental group	The number of dropout	10	25				42			4
		The reason of dropout	Unclear	Unclear							Unclear
	control group 1	The number of dropout	8	18				12			3
		The reason of dropout	Unclear	Unclear							Unclear
	control group 2	The number of dropout
		The reason of dropout
	Result description (binary variable)
	Experimental group	Number of incidents
		No incidents
		Total
	control group	Number of incidents
		No incidents
		Total
	Result description (continuous variable)
	Experimental group
	Indicator 1	Before intervention（M±SD）	50.72±18.76	44	3.58 0.3			37			14.86±13.35	41.78±14.90
		After the intervention（M±SD）	43.80±18.33	45.4±30.19	自己算			27			13.20±7.05	40.31±12.10
	Indicator 2	Before intervention（M±SD）			3.08 0.9
		After the intervention（M±SD）			2.87 0.7
	Indicator 3	Before intervention（M±SD）			自己算
		After the intervention（M±SD）			自己算
	Indicator 4	Before intervention（M±SD）			自己算
		After the intervention（M±SD）			自己算
	Indicator 5	Before intervention（M±SD）			自己算
		After the intervention（M±SD）			自己算
	control group
	Indicator 1	Before intervention（M±SD）	48.52±13.97	48.6	3.91 0.4			33			20±11.5	43.16 ±13.42
		After the intervention（M±SD）	47.36±17.45	49.4±28.41	自己算			32			13.96±8.63	41.64 ±12.18
	Indicator 2	Before intervention（M±SD）			3.95 0.7
		After the intervention（M±SD）			3.77 0.6
	Indicator 3	Before intervention（M±SD）			自己算
		After the intervention（M±SD）			自己算
	Indicator 4	Before intervention（M±SD）			自己算
		After the intervention（M±SD）			自己算
	Indicator 5	Before intervention（M±SD）			自己算
		After the intervention（M±SD）			自己算
	Other information or comments
	Comment 1
	Comment 2
	Points to be discussed or clarified
Outcome 3	Whether it is the primary outcome indicator（Yes/Unclear/No）		Yes	Yes							Yes
	Indicator 1	Measurement methods	Questionnaire	Questionnaire							Questionnaire
		Measuring tools	Questionnaire	Questionnaire							Questionnaire
		Measurement scale	PCL	CAPS							PCL
		Evaluation time	18 weeks	6-month followup							6-months
	Indicator 2	Measurement methods
		Measuring tools
		Measurement scale
		Evaluation time
	Indicator 3	Measurement methods
		Measuring tools
		Measurement scale
		Evaluation time
	Indicator 4	Measurement methods
		Measuring tools
		Measurement scale
		Evaluation time
	Indicator 5	Measurement methods
		Measuring tools
		Measurement scale
		Evaluation time
	……
	Is there a subgroup analysis in this study		No	No							No
	Is there any withdrawal/drop to follow-up in this study?		Yes	Yes							Yes
	Experimental group	The number of dropout	9	19							2
		The reason of dropout	Unclear	Unclear							Unclear
	control group 1	The number of dropout	5	22							4
		The reason of dropout	Unclear	Unclear							Unclear
	control group 2	The number of dropout
		The reason of dropout
	Result description (binary variable)
	Experimental group	Number of incidents
		No incidents
		Total
	control group	Number of incidents
		No incidents
		Total
	Result description (continuous variable)
	Experimental group
	Indicator 1	Before intervention（M±SD）	43.80±18.33	45.4							13.20±7.05
		After the intervention（M±SD）	44.58±16.43	46.5±37.47							8.67±7.98
	Indicator 2	Before intervention（M±SD）
		After the intervention（M±SD）
	Indicator 3	Before intervention（M±SD）
		After the intervention（M±SD）
	Indicator 4	Before intervention（M±SD）
		After the intervention（M±SD）
	Indicator 5	Before intervention（M±SD）
		After the intervention（M±SD）
	control group
	Indicator 1	Before intervention（M±SD）	47.36±17.45	49.4							13.96±8.63
		After the intervention（M±SD）	42.74±14.42	52.3±41.49							17.50±10.40
	Indicator 2	Before intervention（M±SD）
		After the intervention（M±SD）
	Indicator 3	Before intervention（M±SD）
		After the intervention（M±SD）
	Indicator 4	Before intervention（M±SD）
		After the intervention（M±SD）
	Indicator 5	Before intervention（M±SD）
		After the intervention（M±SD）
	Other information or comments
	Comment 1
	Comment 2
	Points to be discussed or clarified
Research quality: methodological characteristics
Study design	Evaluation (low, high, unclear)				不清楚
	Reasons				不清楚方案Thirty-four participants were randomized
Random sequence generation	Evaluation (low, high, unclear)		Low	Unclear	不清楚	不清楚	Low	不清楚	高	Low	Unclear	Low
	Reasons		and employed a random permuted blocking scheme (1:1 allocation ratio with variable block size of four to six) was employed.)	Only mentioned that it is randomly assigned	were randomized to the WIRED intervention	只写了随机分配	Randomization was based on a computer-generated randomization list in excel.	nd 617 participants were randomized (see Figure 1)	As the study was conducted within standard clinical practice, patients received treatment at their local facility (telehealth at CBOCs; in person at VAMC) and were not randomly assigned within the two primary treatment conditions (telehealth and in person).	Computer-generated randomization	Only mentioned that it is randomly assigned	Permuted-blocks randomized participants based on whether they met DSM-IV criteria for a current substance use disorder and diagnostic vs. subthreshold PTSD.
Allocation concealment	Evaluation (low, high, unclear)		Unclear	Unclear	高	不清楚	Low	不清楚	不清楚	Unclear	Unclear	Unclear
	Reasons		Don't know how to distribute	Not mentioned in the article	Those who were randomized to the WIRED intervention the experimental condition were also provided information about how to gain access to the WIRED intervention.	文中未提及	All eligible active service members were released from their routin eduty for the assessments, without knowledge of their seniors about participation in a treatment study.		文中未提及	Not mentioned in the article	Not mentioned in the article	Not mentioned in the article
Blinding of participants and personnel	Evaluation (low, high, unclear)		Low	Unclear	高	不清楚	Low	不清楚	不清楚	Unclear	Unclear	Unclear
	Reasons		the nature of the intervention precluded blinding of providers and participants. Participants were randomized to DESTRESS-PC plus OUC or OUC alone.	Not mentioned in the article	Those who were randomized to the experimental condition were also provided information about how to gain access to the WIRED intervention.	文中未提及	All eligible active service members were released from their routin eduty for the assessments, without knowledge of their seniors about participation in a treatment study.		文中未提及盲法	(AAU), participants received instructions to “go about [their] lives as [they] normally do over the next 3 months.”	Not mentioned in the article	Not mentioned in the article
Blinding of outcome assessment	Evaluation (low, high, unclear)		Low	Low	不清楚	不清楚	Unclear	Unclear	Unclear	Unclear	Unclear	Unclear
	Reasons		We blinded the outcome raters in this trial	Third party	没有足够信息判断为低风险或高风险；研究未描述此情况		Not mentioned in the article	Not mentioned in the article	Not mentioned in the article	Not mentioned in the article	Not mentioned in the article	Not mentioned in the article
Incomplete outcome data	Evaluation (low, high, unclear)		Low	High	低	高	Low	低	低	Low	Low	Low
	Reasons		Complete	Lack of SD	数据完整		There is a research plan, and the results indicators (primary and secondary results) specified in the forecast in the systematic review of the plans concerned are reported		完整	Complete	Complete	Complete
Selective reporting	Evaluation (low, high, unclear)		Low	Low	低	高	Low	低	低	Low	Low	Low
	Reasons		Nothing	Nothing	Nothing	Nothing	Nothing	Nothing	Nothing	Nothing	Nothing	Nothing
Other bias	Evaluation (low, high, unclear)		Low	Low	低	不清楚	High	低	高	Low	High	High
	Reasons		Nothing	Nothing	无		Does not distinguish between being in service or retired		分组没有随机分配	Nothing	Didn't mention how to allocate randomly	All based on the network, based on the classification
